# Supplementary material
Source: Springer Nature journal article supplement (https://www.springermedizin.de/resource/supplementary/12891_2010_1087_MOESM4_ESM.pdf/9507684)

**Uncompressed**

**Compressed**

**DMSO**

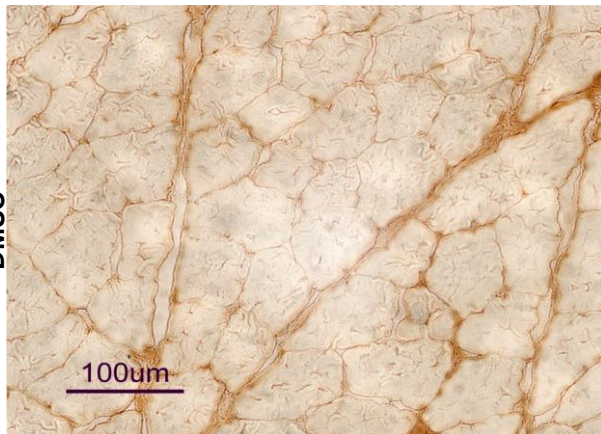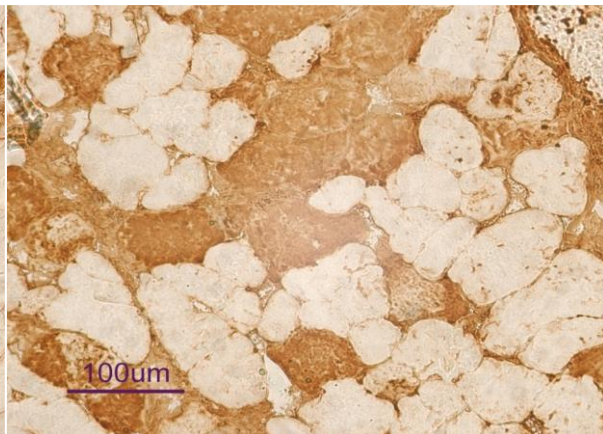

**MG132**

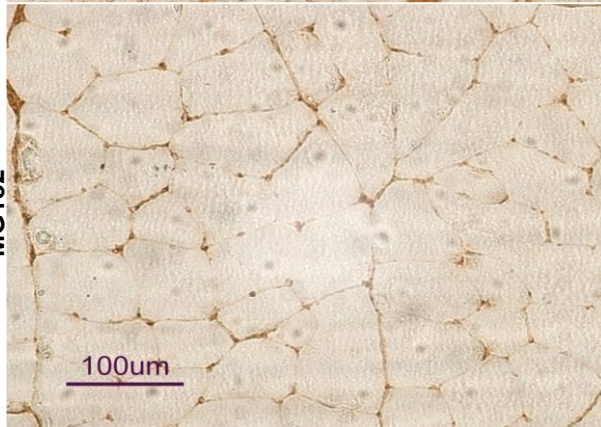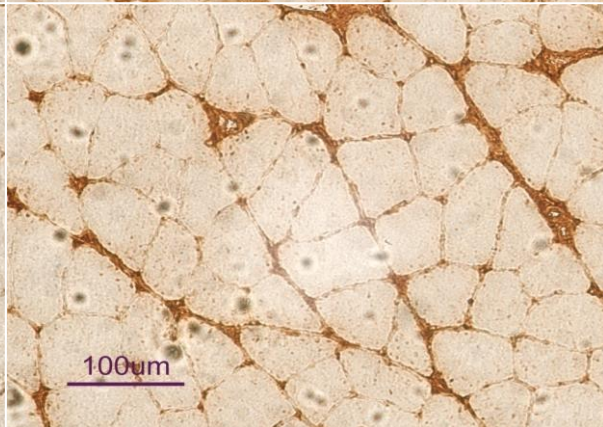

Supplement: MOESM4 [file 9507684]
